# Supplementary material for: Reactivity of UH3 with mild oxidants
Source: Royal Society of Chemistry journal article supplement (doi:10.1039/b809184f), 2008-01-01
Supplement: b809184f.pdf [file b809184f.pdf]

**Supporting Information for:**  
**Reactivity of UH<sub>3</sub> with Mild Oxidants**

David D. Schnaars, Guang Wu, and Trevor W. Hayton\*

Department of Chemistry and Biochemistry, University of California Santa Barbara,  
Santa Barbara CA 93106

\*To whom correspondence should be addressed. Email: hayton@chem.ucsb.edu

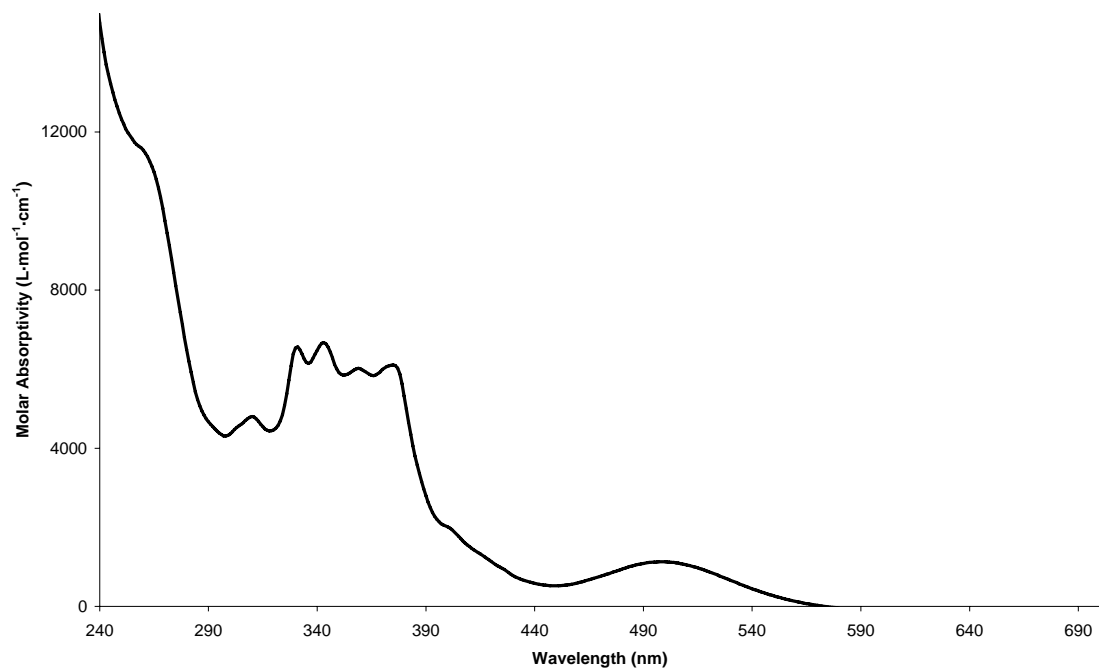

**Figure S1.** UV/Vis spectrum of **1** in Et<sub>2</sub>O (0.091 mM).

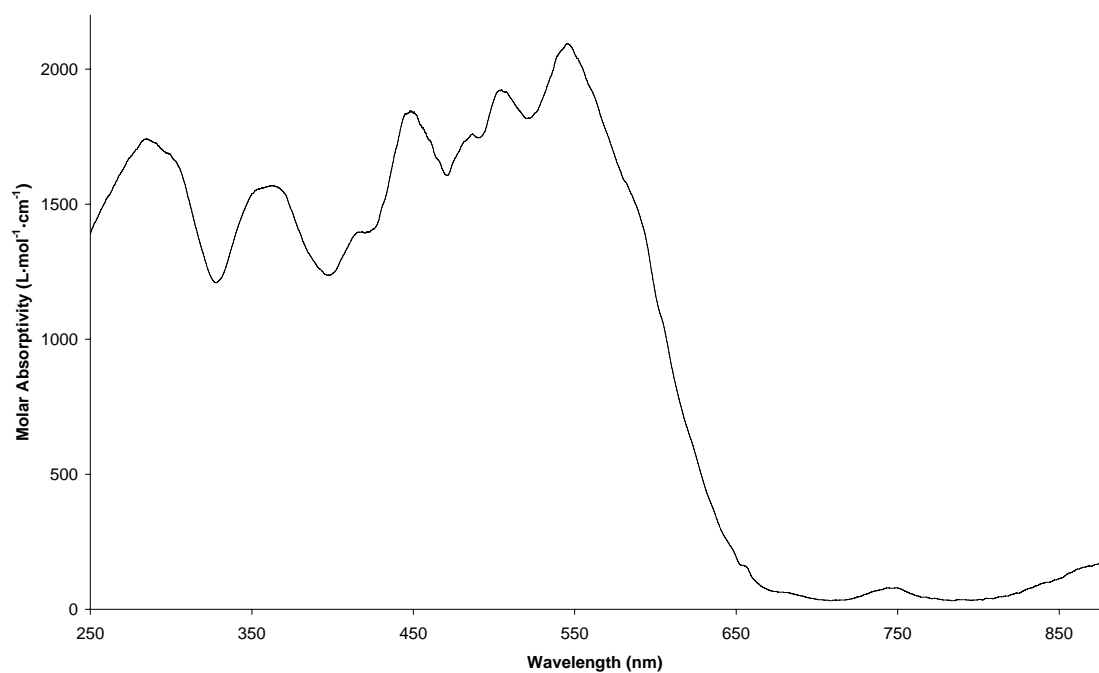

**Figure S2.** UV/Vis spectrum of **2** in DME (0.87 mM).

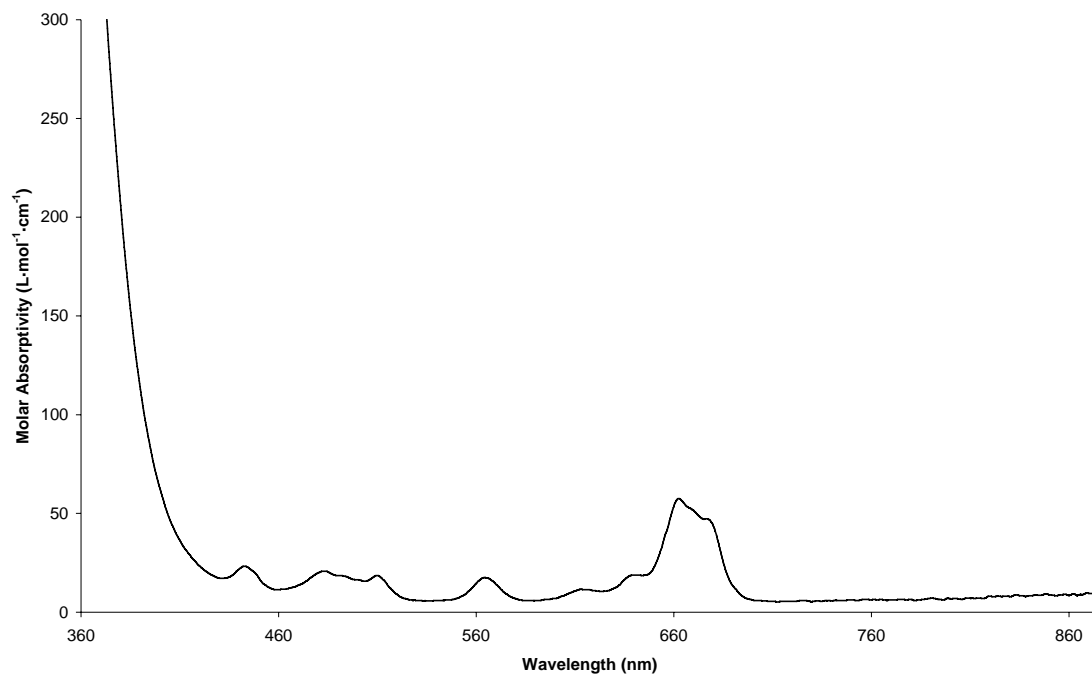

**Figure S3.** UV/Vis spectrum of **3** in DME (4.2 mM).

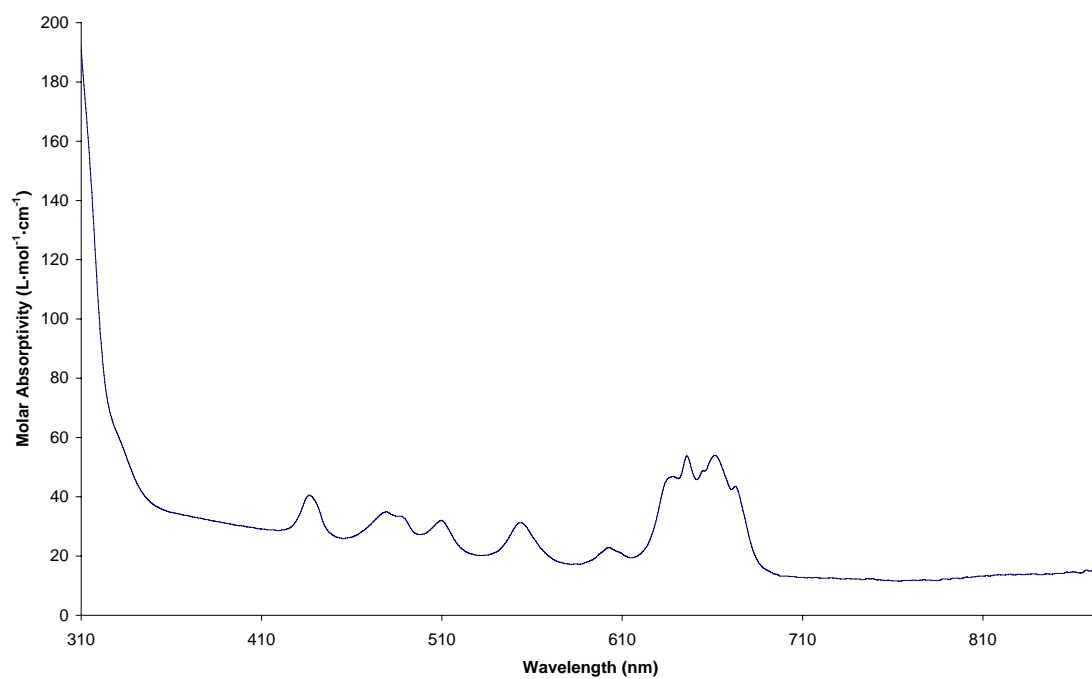

**Figure S4.** UV/Vis spectrum of **4** in DME (6.6 mM).

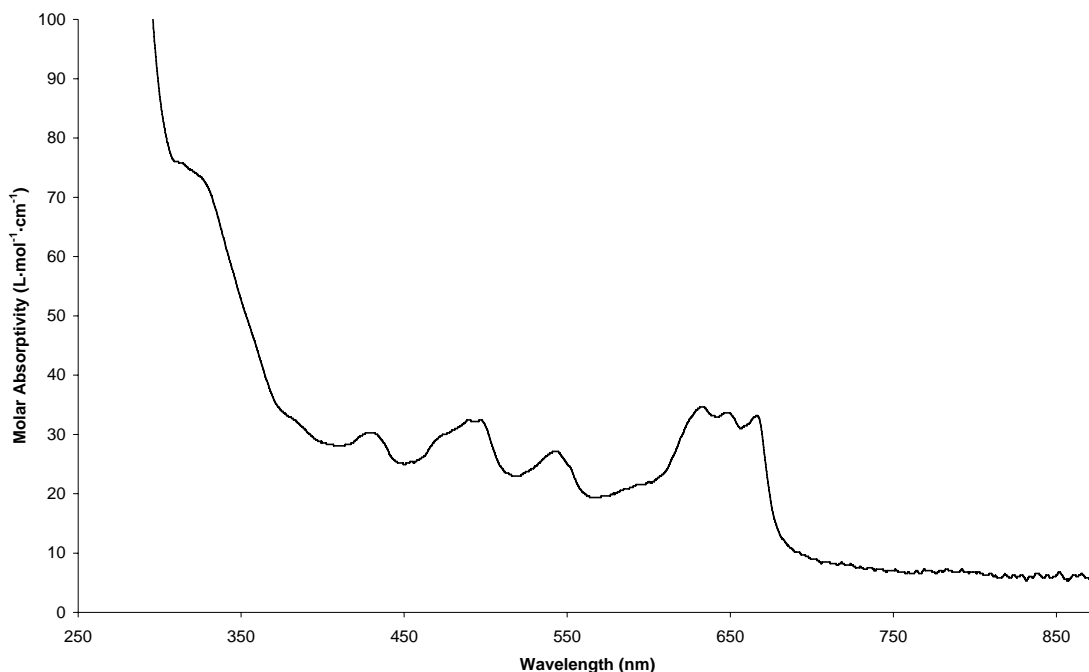

**Figure S5.** UV/Vis spectrum of **5** in DME (4.1 mM).

### **X-ray Crystallography.**

Further details of the X-ray crystallographic determinations of complexes **1**, **2**·CH<sub>2</sub>Cl<sub>2</sub>, **3**, **4**, and **5** can be found in the following paragraphs:

For complexes **3** and **4**, as the crystals did not have a regular shape, it would be difficult to determine the individual faces and corresponding center-face distances precisely. Thus, we used empirical absorption correction instead of numeric correction.

For complexes **1**, **3**, **4**, and **5** relatively high Rint values are observed. We attribute this to significant absorption ( $\mu > 10\text{mm}^{-1}$ ) due to the presence of heavy atoms. As a result, the empirical absorption correction based on psi-scan may not perfectly correct for the absorption effect.

For complex **4** large maximum and minimum residual electron densities are observed. For instance, the structure has a highest residual peak of 6.63 at 0.2513 0.5946 0.2196 (0.88 Å from U1) and a lowest residual peak -4.51 at 0.2303 0.5513 0.2581 (0.96 Å from U1). Because of their close proximity to the heavy uranium atom they are likely 'ghost peaks'.
